# Supplementary material
Source: PubMed Central journal article supplement (PMC4863382)
Supplement: supp_tpc.15.00812_TPC2015-00812-RAR2_Supplemental_Data.pdf [file supp_tpc.15.00812_TPC2015-00812-RAR2_Supplemental_Data.pdf]

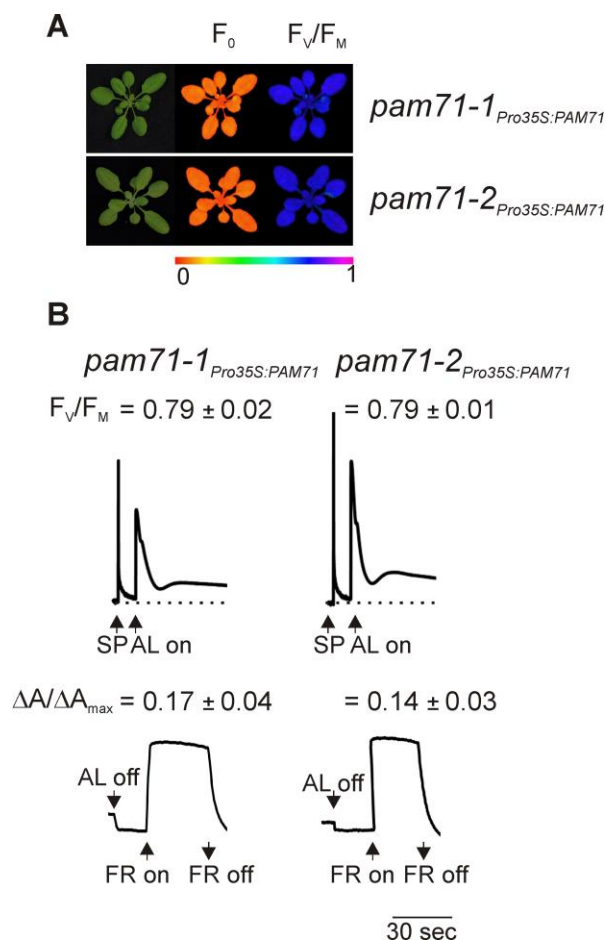

### Supplemental Figure 1. Complementation of *pam71-1* and *pam71-2*

- A. Four-week-old complemented lines (*pam71-1*<sub>Pro35S:PAM71</sub>, *pam71-2*<sub>Pro35S:PAM71</sub>) were grown on a 12h/12h dark/light cycle at 21°C/18°C and at 90  $\mu\text{mol photons m}^{-2} \text{s}^{-1}$ , and the minimal chlorophyll a fluorescence ( $F_0$ ) (middle panel) and maximum quantum yield of PSII ( $F_V/F_M$ ) (right panel) were recorded. The color scale at the bottom indicates the signal intensities.
- B. Chlorophyll a fluorescence induction curves (top panel) and  $P_{700}$  redox kinetics (bottom panel) were recorded from leaves of the two genotypes.  $F_V/F_M$  values are indicated. For chlorophyll a fluorescence measurement, the minimal level of fluorescence of dark-adapted leaves is indicated by dashed lines. Saturating pulses (SP) and actinic light (AL, 100  $\mu\text{mol photons m}^{-2} \text{s}^{-1}$ ) were applied as indicated. For  $P_{700}$  absorption measurements, leaves were first illuminated with actinic light (AL, 100  $\mu\text{mol photons m}^{-2} \text{s}^{-1}$ ) for 4 min and absorbance changes (at 830 nm) induced by exposure to far-red light (FR, 720 nm) were recorded. Mean values ( $\pm$  SD) are each based on five individual plants.

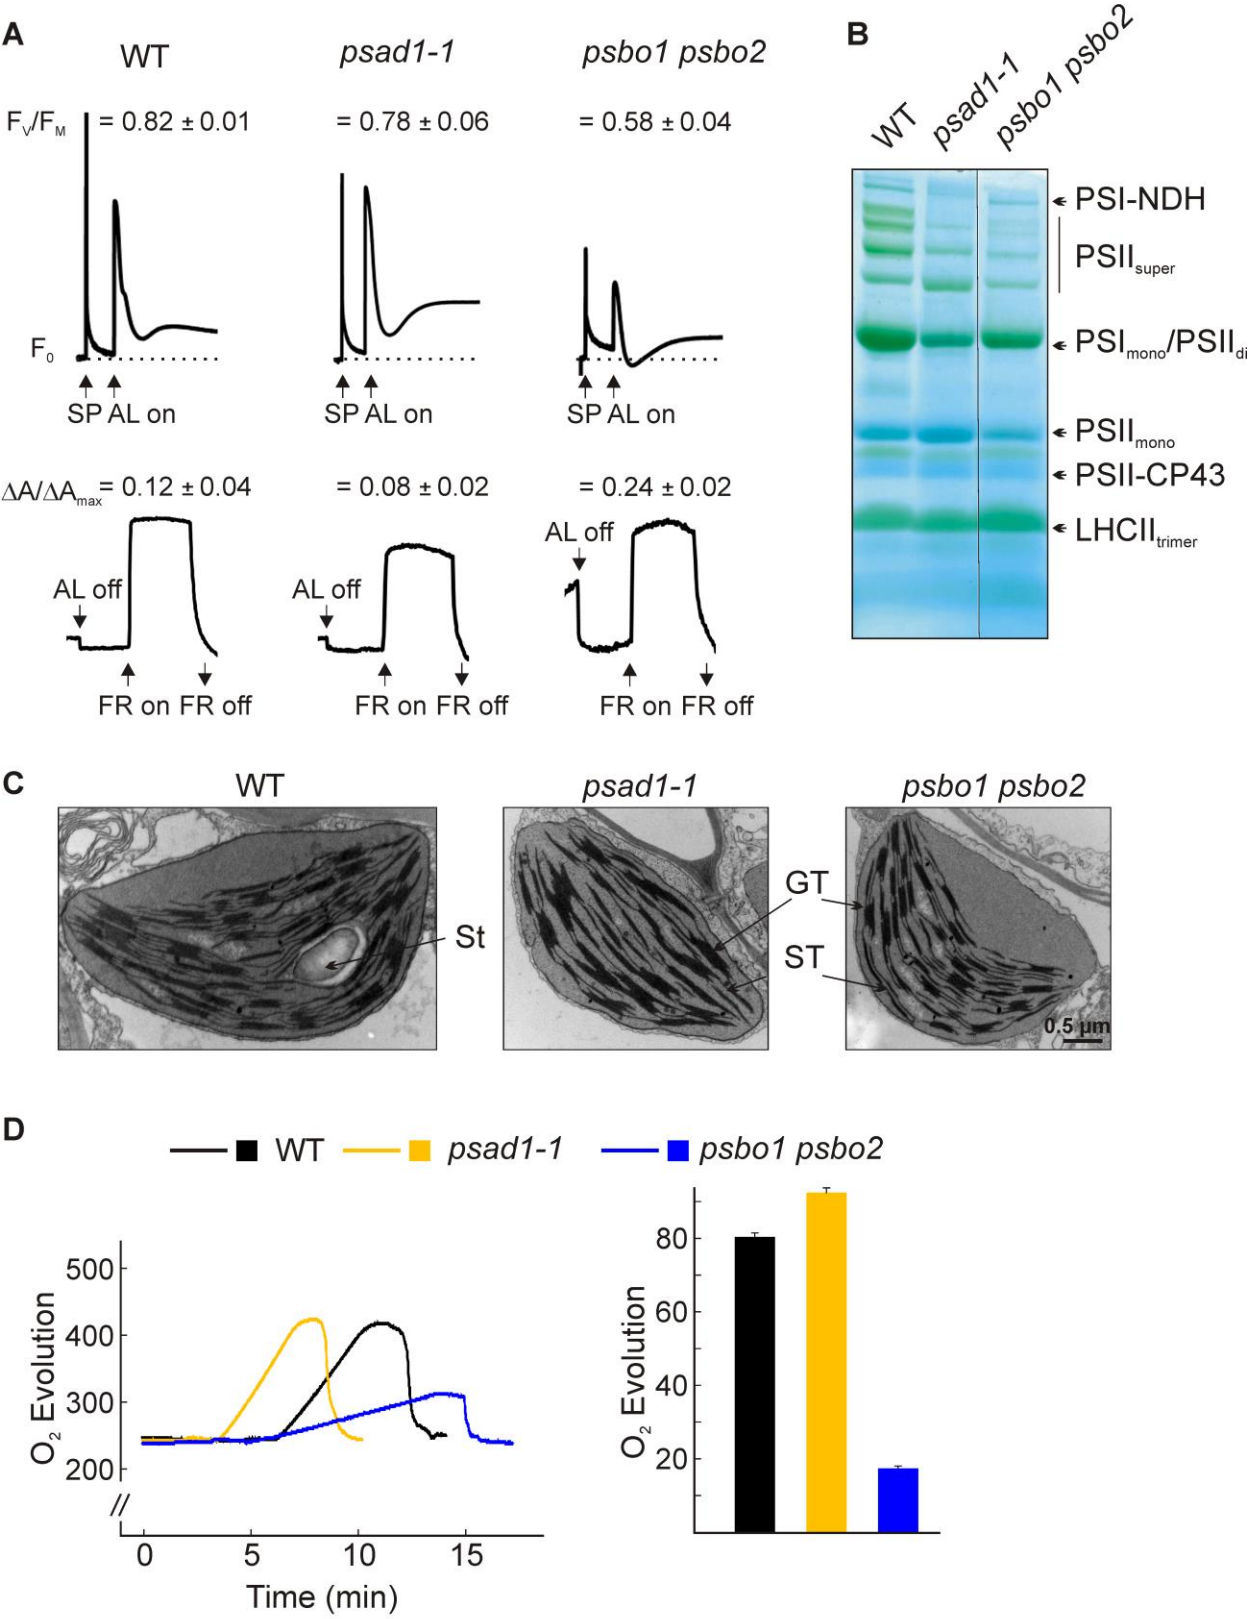

**Supplemental Figure 2. Characterization of *psbo1 psbo2* and *psad1-1* with respect to chlorophyll a fluorescence parameters, thylakoid protein complex accumulation and ultrastructure, and oxygen evolution**

- A. Chlorophyll a fluorescence induction curves (top panel) and  $P_{700}$  redox kinetics (bottom panel) were recorded from leaves of the indicated genotypes (WT, *psad1-1*, *psbo1 psbo2*).  $F_v/F_M$  values are indicated for each genotype. For chlorophyll a fluorescence measurement, the minimal level of fluorescence of dark-adapted leaves is indicated by dashed lines. Application of saturating pulses (SP) and actinic light (AL,  $100 \mu\text{mol photons m}^{-2} \text{s}^{-1}$ ) are indicated. For  $P_{700}$  absorption measurements leaves were first illuminated with actinic light (AL,  $100 \mu\text{mol photons m}^{-2} \text{s}^{-1}$ ) for 4 min and absorbance changes at 830 nm induced by exposure to far-red light (FR, 720 nm) were recorded. Mean values ( $\pm$  SD) are each based on five individual plants.
- B. Accumulation of thylakoid membrane complexes in wild type (WT), *psad1-1* and *psbo1 psbo2* lines. Thylakoid membranes ( $25 \mu\text{g}$  of chlorophyll) were solubilized with 1% [w/v]  $\beta$ -dodecyl maltoside, and protein complexes were fractionated by Blue-native gel electrophoresis. The positions of protein complexes (trimeric LHCII = LHCII<sub>trimer</sub>, CP43-free PSII complexes = PSII-CP43, PSII monomers = PSII<sub>mono</sub>, PSII dimers = PSII<sub>di</sub>, PSI monomers = PSI<sub>mono</sub>, PSII supercomplexes = PSII<sub>super</sub> and PSI-NDH) are indicated.
- C. Electron micrographs of WT, *psad1-1* and *psbo1 psbo2* leaf sections are shown and starch (St), grana thylakoids (GT) and stroma thylakoids (ST) are indicated.
- D. Oxygen evolution [ $\text{nmol O}_2 \text{ mL}^{-1}$ ] of WT, *psad1-1* and *psbo1 psbo2* was measured over the indicated time in isolated thylakoids adjusted to  $30 \mu\text{g Chl mL}^{-1}$  and using DCBQ as external electron acceptor (left panel). Reactions were started with the application of actinic light at  $500 \mu\text{mol photons m}^{-2} \text{s}^{-1}$ . Oxygen evolution rate [ $\mu\text{mol O}_2 \text{ mg Chl}^{-1} \text{ h}^{-1}$ ] was calculated from two independent thylakoid preparations including three replicates ( $\pm$ SD) (right panel).

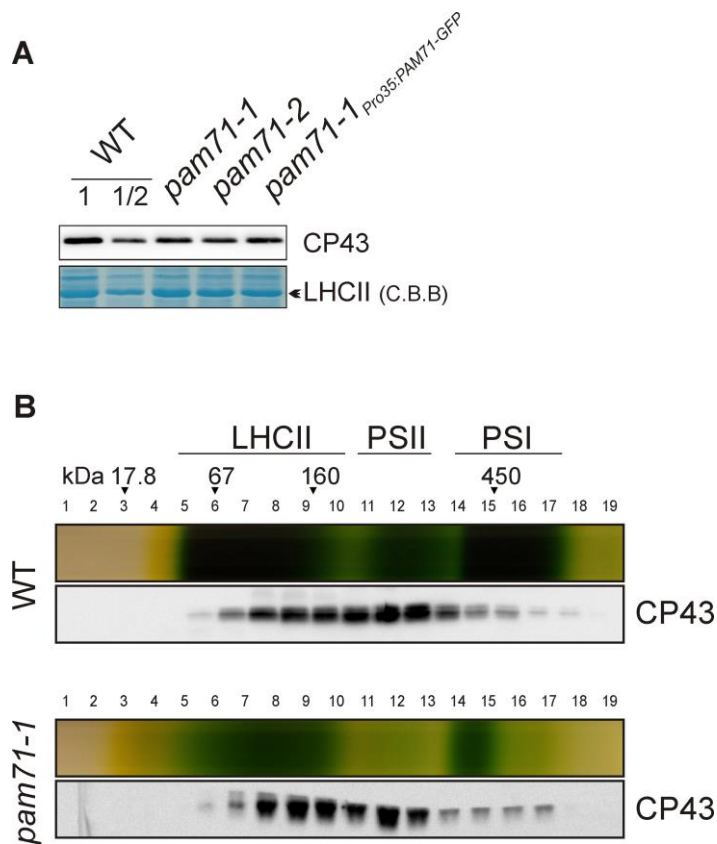

### Supplemental Figure 3. Analysis of the CP43 subunit in *pam71-1*

- A. Immunodetection of the thylakoid protein CP43 in WT, *pam71-1*, *pam71-2* and *pam71-1*<sub>Pro35S:PAM71-GFP</sub>. Samples equivalent to 15 µg protein were loaded in all lanes, except in those marked WT ½, where only half as much was loaded. As loading control, LHCII was visualized by Coomassie blue (C.B.B.).
- B. Thylakoid membrane fractionation of WT and *pam71-1*. Thylakoids (1 mg Chl mL<sup>-1</sup>) were solubilized with 1% [w/v] β-dodecyl maltoside, and complexes were separated in a linear 0.1 to 1 M sucrose gradient. Nineteen fractions were collected, proteins from each fraction were precipitated, and immunoblot analysis was performed using an anti-CP43 antibody. The positions of molecular mass markers and of the major complexes (LHCII, PSII, PSI) are indicated.

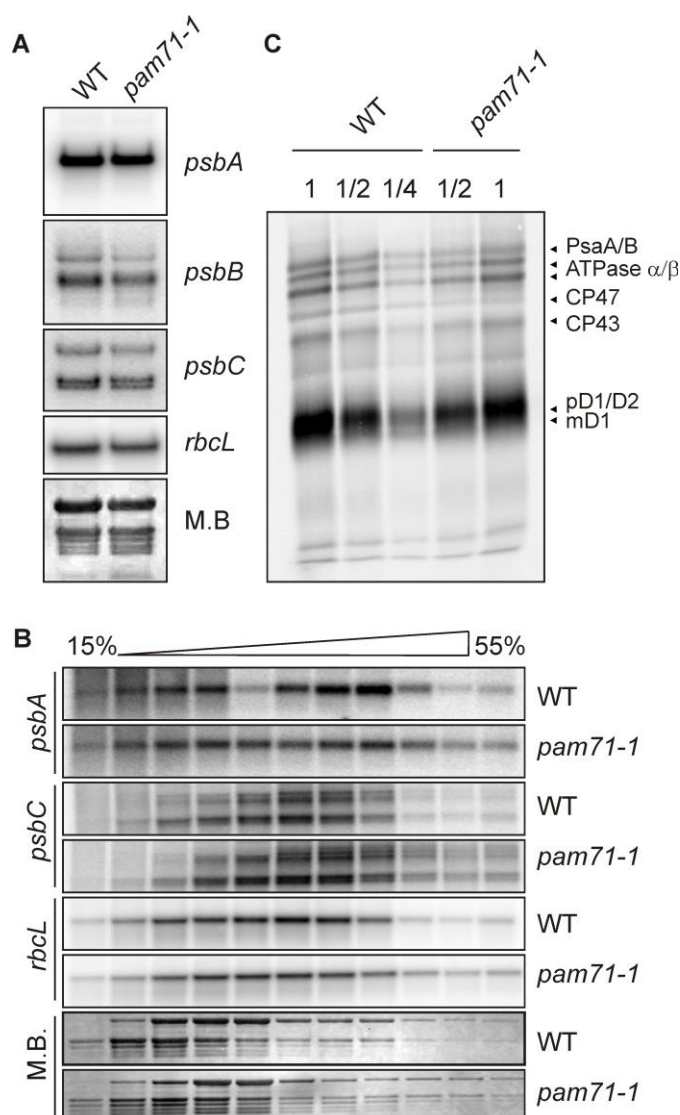

#### Supplemental Figure 4. Transcription and translation of chloroplast-encoded proteins

- Transcript analysis in WT and *pam71-1*. Fifteen  $\mu$ g of total leaf RNA was subjected to RNA gel blot analysis and hybridized with probes specific for *psbA*, *psbB*, *psbC* and *rbcL*. As loading control, blots were stained with methylene blue (M.B).
- Association of *psbA*, *psbC* and *rbcL* mRNAs with polysomes. Extracts of WT and *pam71-1* leaves were fractionated in a sucrose gradient and RNA was isolated from 11 fractions. As loading control, blots were stained with methylene blue (M.B).
- Incorporation of [ $^{35}$ S]Met into thylakoid membrane proteins of 4-week old plants. Pulse-labelling was performed for 20 min in the presence of cycloheximide. WT samples corresponding to 100,000 cpm were loaded in lanes marked 1 and the corresponding dilutions in lanes marked 1/2 and 1/4.

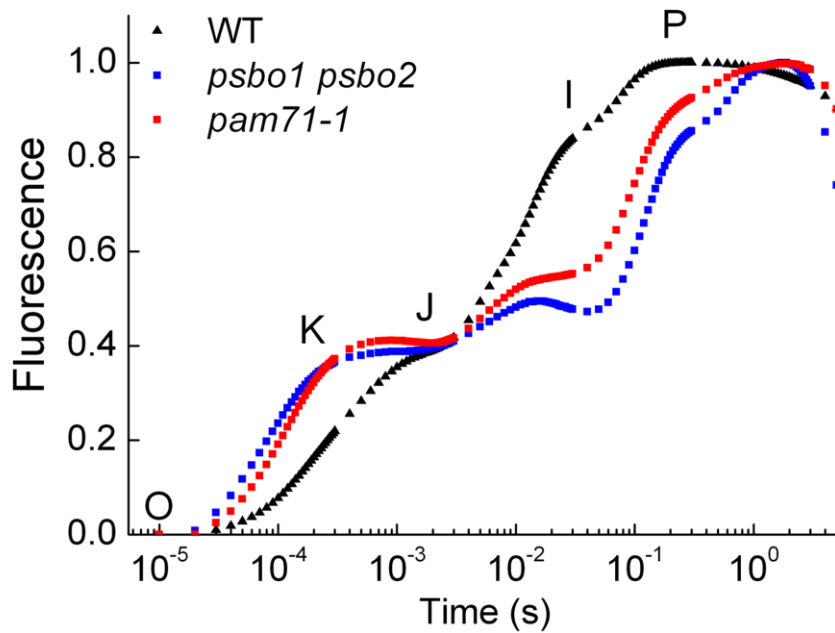

### Supplemental Figure 5. Fast chlorophyll a fluorescence kinetics

Fast chlorophyll a fluorescence kinetics (O-K-J-I-P) of leaves of WT, *psbo1 psbo2* and *pam71-1* which were dark-adapted for 10 min. Development of the K peak after approximately 300  $\mu$ s is observed in *psbo1 psbo2* and *pam71-1*. The occurrence of the K peak is generally supposed to be an indicator of damage to the OEC (Bukhov et al., 2004). Maximum fluorescence was normalized to one in each sample.

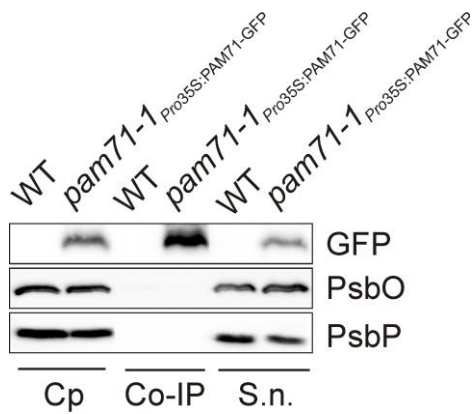

**Supplemental Figure 6. Co-immunoprecipitation analysis using *pam71-1<sup>Pro35S:PAM71-GFP</sup>***

Thylakoid membrane proteins were solubilized and incubated with anti-GFP antibody. The precipitated proteins were separated and analyzed by immunodetection using anti-PsbO and anti-PsbP antibodies. Immunodetection using anti-GFP served as the positive control, and thylakoid membrane proteins isolated from wild-type (WT) served as the negative control. Cp, total chloroplast fraction; Co-IP, co-immunoprecipitated proteins; S.n. supernatant.

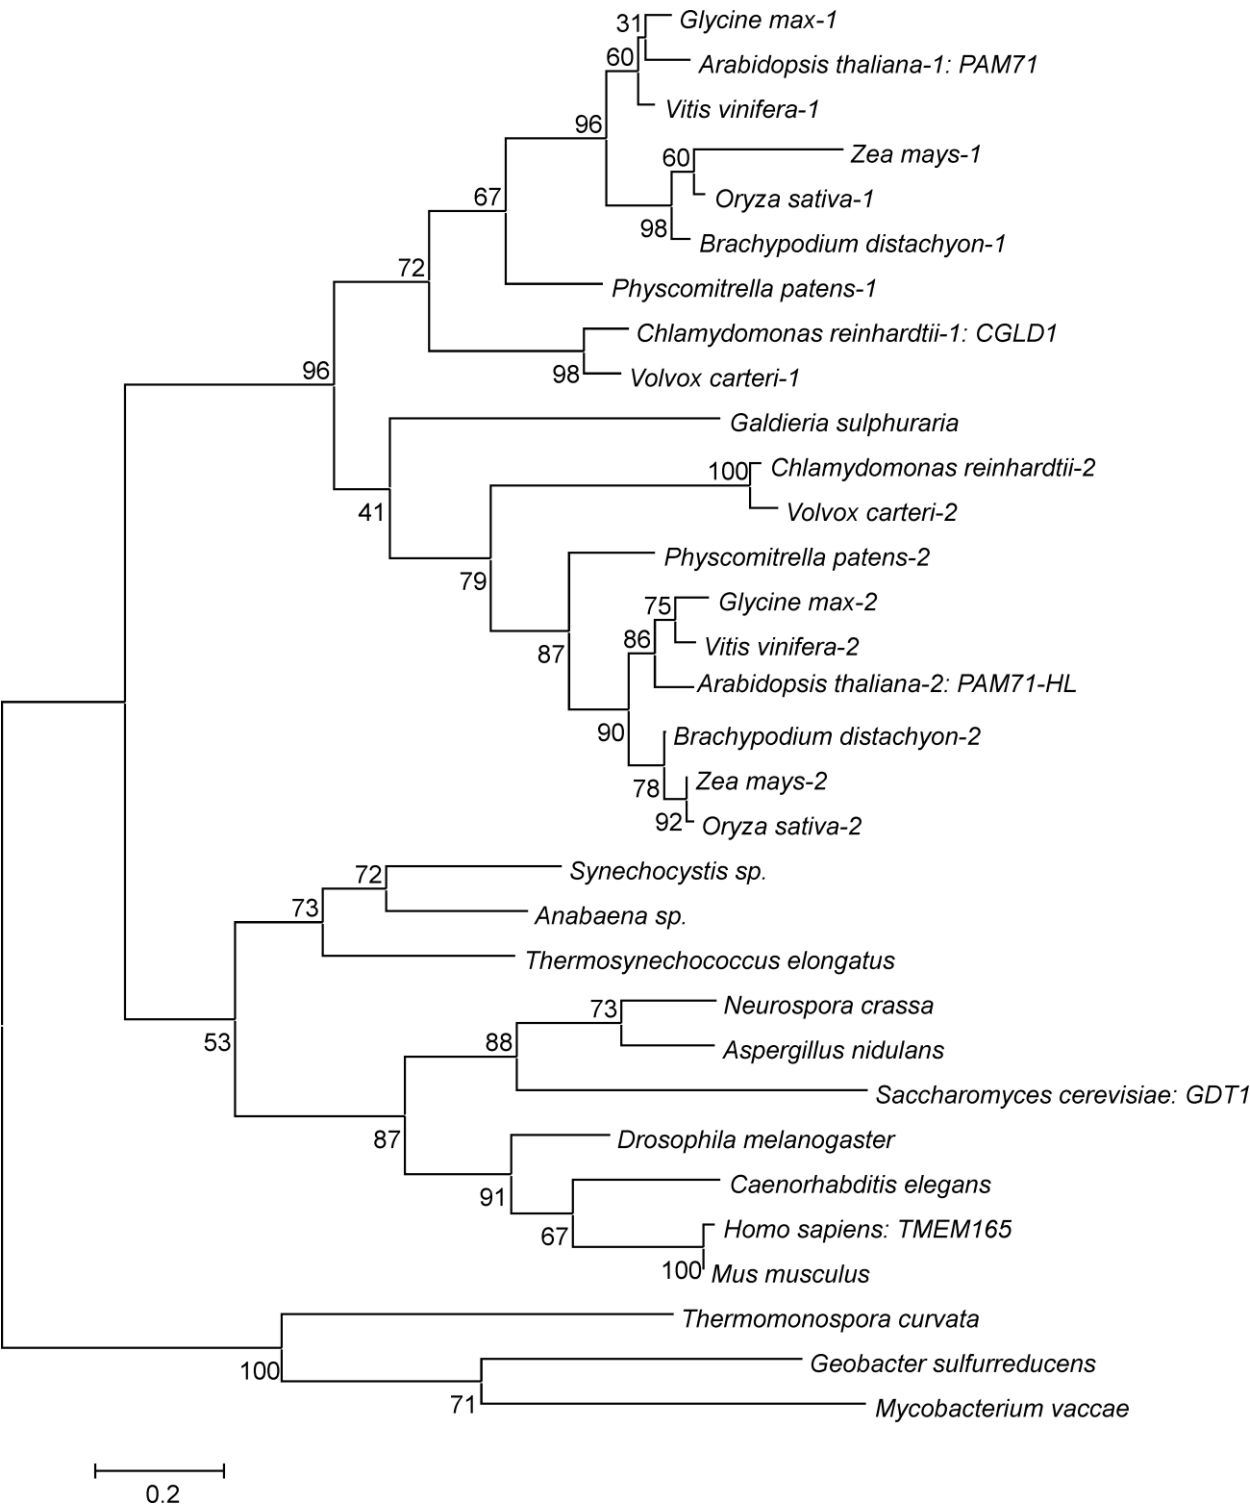

## Supplemental Figure 7. Phylogenetic analysis

The phylogenetic tree was constructed using the program MEGA (version 6) (Tamura, 2013). The evolutionary history was inferred by using the maximum-likelihood method based on the General Reverse Transcriptase + Freq. model (Dimmic et al., 2002). The tree with the highest log likelihood (-3694,0511) is shown. The tree is drawn to scale, with branch lengths measured in the number of substitutions per site. The scale bar is an indicator for the evolutionary distance in substitutions per site. The analysis involved 32 amino acid sequences. All positions containing gaps and missing data were eliminated. There were a total of 104 positions in the final dataset. Bootstrap values (based on 1000 iterations) are shown for corresponding nodes, e.g. the percentage of trees in which the associated taxa clustered together. The analysis involved 32 amino acid sequences (Accession numbers: *Arabidopsis thaliana*-1 NP\_564825.1 (At1g64150/PAM71), *Glycine max*-1 NP\_001241025.1; *Vitis vinifera*-1 XP\_002272191.1; *Oryza sativa*-1 EEC70197.1; *Brachypodium distachyon*-1 XP\_003565685.1; *Zea mays*-1 XP\_008655787.1; *Physcomitrella patens*-1 XP\_001756332.1; *Chlamydomonas reinhardtii*-1 XP\_001701915.1/XM\_001701863 (CGLD1); *Volvox carteri*-1 XP\_002953583.1; *Galdieria sulphuraria* EME31602.1; *Arabidopsis thaliana*-2 NP\_193095.2 (At4g13590); *Oryza sativa*-2 NP\_001068053.1; *Glycine max*-2 XP\_003535962.1; *Vitis vinifera*-2 XP\_002285620.1; *Zea mays*-2 ACG35639.1; *Brachypodium distachyon*-2 XP\_003570533.1; *Physcomitrella patens*-2 XP\_001770923.1; *Chlamydomonas reinhardtii*-2 XP\_001697928.1; *Volvox carteri*-2 XP\_002949806.1; *Synechocystis* sp. WP\_010873575.1; *Thermosynechococcus elongatus* NP\_681169.1; *Anabaena* sp. WP\_016950136.1; *Homo sapiens* NP\_060945.2 (TMEM165); *Mus musculus* AAI41082.1; *Drosophila melanogaster* ACR20070.1; *Caenorhabditis elegans* NP\_497567.1; *Saccharomyces cerevisiae* AHY74663.1 (GDT1); *Neurospora crassa* CAE76363.1; *Aspergillus nidulans* XP\_662418.1; *Geobacter sulfurreducens* NP\_951914.1; *Mycobacterium vaccae* EJZ12059.1; *Thermomonospora curvata* WP\_012855029.1.

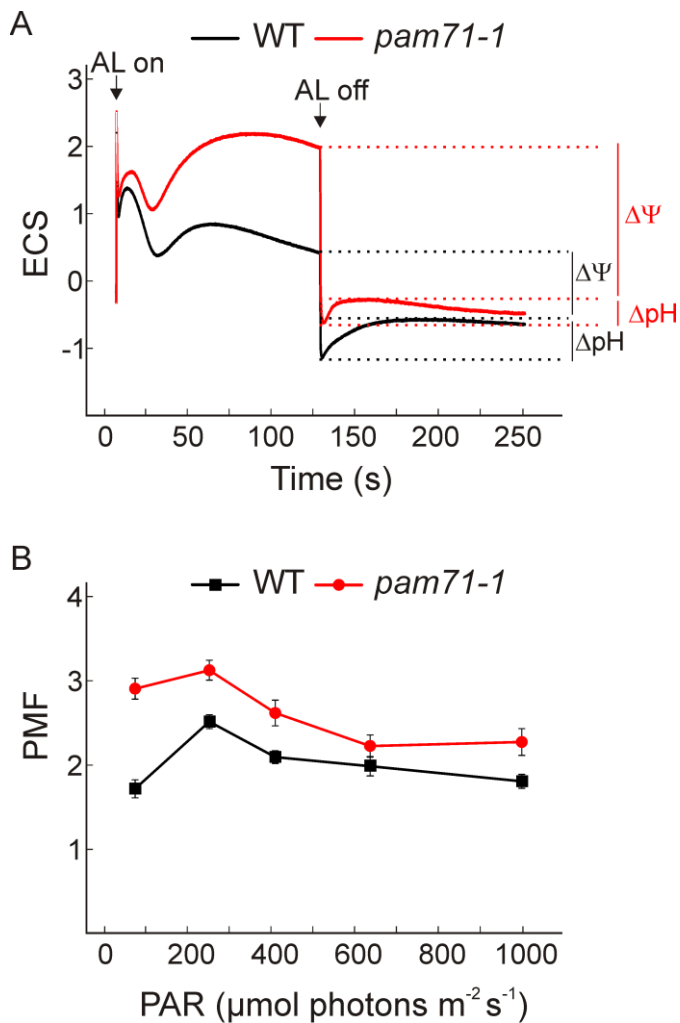

### Supplemental Figure 8. Proton motive force size and composition

- ECS [515-550 nm  $\Delta I/I$   $10^3$ ] was determined after actinic light (AL) was switched off. Before AL was switched off, leaves were 2 min illuminated at 90  $\mu\text{mol photons m}^{-2} \text{s}^{-1}$ . Both components of PMF ( $\Delta\Psi$  and  $\Delta pH$ ) are indicated.
- Magnitude of the PMF [ $\text{ECS}_t$ ]. Leaves from plants that were dark-adapted overnight were illuminated for 2 min at increasing light intensities. The size of the proton motive force was determined. The data are means  $\pm$  SEM ( $n=9$ ).

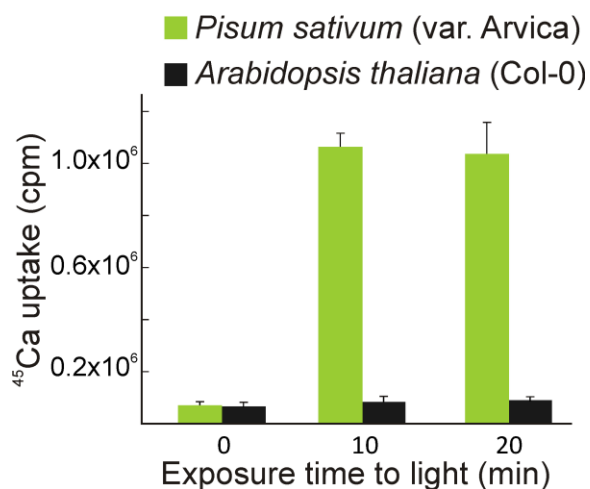

### Supplemental Figure 9. Light-dependent accumulation of <sup>45</sup>Ca<sup>2+</sup> across thylakoid membranes of pea and Arabidopsis

<sup>45</sup>Ca<sup>2+</sup> uptake [cpm] in intact chloroplasts. Chloroplasts were isolated, incubated for 10 min on ice in 10 mM HEPES/NaOH [pH 7.6] containing 5 mM MgCl<sub>2</sub>, and vortexed to release thylakoids. Reactions were initiated by adding <sup>45</sup>Ca<sup>2+</sup> (1.5 μM final concentration) to thylakoid membranes adjusted to 0.3 mg Chl mL<sup>-1</sup> and illuminating the samples at 90 μmol photons m<sup>-2</sup> s<sup>-1</sup>. After the indicated times, the reactions were stopped by adding 50 mM EGTA. A value of 10<sup>6</sup> cpm corresponds to 0.02 μl <sup>45</sup>Ca<sup>2+</sup>. Values represent three experimental replicates (±SD). Similar results were obtained in an independent experiment.

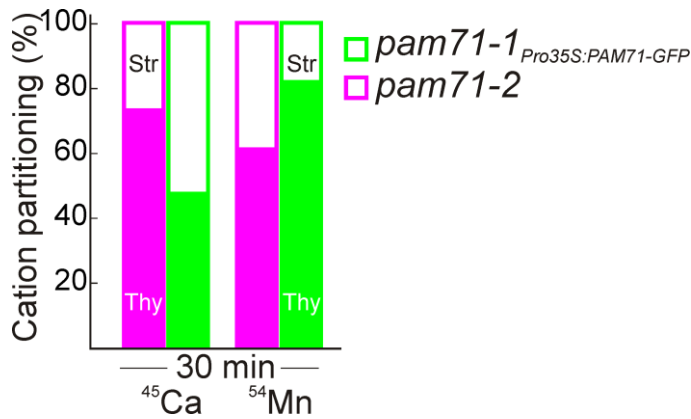

**Supplemental Figure 10. Cation partitioning in *pam71-2* and *pam71-1<sub>Pro35S:PAM71-GFP</sub>***

$^{45}\text{Ca}^{2+}$  and  $^{54}\text{Mn}^{2+}$  uptake was performed as described in Figure 7 legend and Methods.  $^{45}\text{Ca}^{2+}$  and  $^{54}\text{Mn}^{2+}$  partitioning between stroma (Str) and thylakoid (Thy) in *pam71-2* and *pam71-1<sub>Pro35S:PAM71-GFP</sub>* chloroplasts [%] is shown. Values are deduced from samples that were incubated for 30 min at  $90 \mu\text{mol photons m}^{-2} \text{s}^{-1}$ .

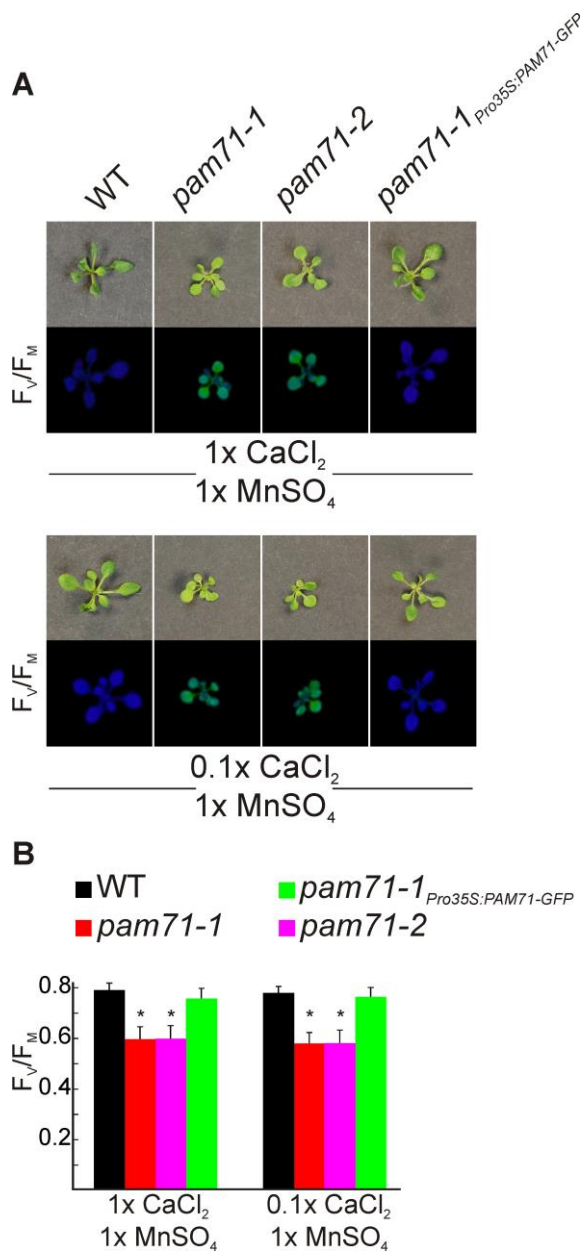

**Supplemental Figure 11. Calcium deprivation does not restore photosynthesis in *pam71***

- A. Seeds of WT, *pam71-1*, *pam71-2* and *pam71-1*<sub>Pro35S:PAM71-GFP</sub> were surface sterilized and grown for 2 weeks on MS medium containing either 1x  $\text{CaCl}_2$  (0.332 g L<sup>-1</sup>) and 1x  $\text{MnSO}_4$  (0.017 g L<sup>-1</sup>), or 0.1x  $\text{CaCl}_2$  (0.0332 g L<sup>-1</sup>) and 1 x  $\text{MnSO}_4$ . At the end of the growth period, the maximum quantum yield of PSII ( $F_v/F_m$ ) was recorded.
- B.  $F_v/F_m$  values are given for WT, *pam71-1*, *psbo1 psbo2* *pam71-2* and *pam71-1*<sub>Pro35S:PAM71-GFP</sub> grown on the indicated MS medium. Bars represent mean values ( $\pm$ SD) of three experiments, each including five individual plants. Asterisks indicate statistical significance (t-test,  $p < 0.001$ ) of differences between WT and mutant plants.

**Supplemental Table 1. Non photochemical quenching under transient illumination in WT and *pam71-1* plants.**

| PAR | WT          | <i>pam71-1</i> |
|-----|-------------|----------------|
| 0   | 0           | 0              |
| 37  | 0.22 ± 0.04 | 0.53 ± 0.08    |
| 53  | 0.33 ± 0.08 | 0.97 ± 0.15    |
| 84  | 0.48 ± 0.14 | 1.10 ± 0.16    |
| 126 | 0.70 ± 0.15 | 1.18 ± 0.16    |
| 157 | 0.84 ± 0.14 | 1.20 ± 0.15    |
| 247 | 1.10 ± 0.14 | 1.25 ± 0.15    |
| 370 | 1.24 ± 0.21 | 1.28 ± 0.14    |
| 562 | 1.30 ± 0.24 | 1.32 ± 0.14    |
| 856 | 1.34 ± 0.24 | 1.35 ± 0.14    |

Leaves of five week old plants were used and NPQ was determined in the range 37-856  $\mu\text{mol photons m}^{-2} \text{s}^{-1}$  photosynthetically active radiation (PAR). The plants were dark-adapted for 30 min prior to measurement. NPQ was recorded following illumination for 30 s at the appropriate PAR. The NPQ parameter was calculated according to the equation:  $\text{NPQ} = (F_M - F_M')/F_M'$  (where  $F_M$  and  $F_M'$  represents the maximal fluorescence of dark adapted or illuminated samples). Values are means ( $\pm$ SD) from 8 individual plants.

**Supplemental Table 2. Homologous PAM71 genes/proteins found in plants**

| Subcellular localisation of proteins: | <i>Arabidopsis thaliana</i> | <i>Vitis vinifera</i> | <i>Zea mays</i> | <i>Oryza sativa</i> | <i>Brachypodium distachyon</i> |
|---------------------------------------|-----------------------------|-----------------------|-----------------|---------------------|--------------------------------|
| Chloroplast                           | At1g64150 (PAM71) [1]       | Vv_02s0025g00720* [1] | Zm2g464891 [1]  | Os01g12220 [1]      | Bradi2g07266 [1]               |
|                                       | At4g13590 (PAM71-HL) [2]    | Vv_05s0051g00440* [2] | Zm2g097674* [2] | Os11g34180 [2]      | Bradi3g57430* [2]              |
| Secretory pathway                     | At1g25520                   | Vv_01s0011g03200      | Zm2g095552      | Os08g33630          | Bradi3g41030                   |
|                                       | At1g68650                   | Vv_04s0023g00380*     | Zm2g151863      | Os08g41670          | Bradi3g36630                   |
|                                       | At5g36290                   |                       | Zm2g160560      | Os11g28300          | Bradi4g19090                   |
|                                       |                             |                       | Zm5g872373      |                     | Bradi5g03610                   |

Data were extracted from the Aramemnon database (<http://aramemnon.botanik.uni-koeln.de/>) and gene numbers given accordingly, except for *Vitis vinifera*, where gene numbering is according to UniProtKB (<http://www.uniprot.org/uniprot/>). Numbers in squared brackets correspond to numbers given in the phylogenetic tree (Supplemental Figure 7). \*A subcellular localisation to mitochondria is additionally predicted.

**Supplemental Table 3. Primers used in this study**

| Primer name         | Sequence (5'-3')                           | Application                 |
|---------------------|--------------------------------------------|-----------------------------|
| 1g64150-F1          | AAT TCT CCT GAA ACT TGG AAG ACA            | Arabidopsis<br>Genotyping   |
| 1g64150-R1          | TTC CGT CTT TAG AAC ACA CTC TCT            |                             |
| 1g64150-F2          | TCT TGA TGT TCT GGT TGA GTC ATC G          |                             |
| 1g64150-R2          | ACT GAA CCA AAA CCA AAA CAA AAC            |                             |
| GK-LB               | ATA TTG ACC ATC ATA CTC ATT GC             |                             |
| 35S-F               | GCA AGA CCC TC CTC TAT ATA AG              | RT-PCR                      |
| RT-Ubi-F            | GGA AAA AGG TCT GAC CGA CA                 |                             |
| RT-Ubi-R            | CTG TTC ACG GAA CCC AAT TC                 |                             |
| RT-1g64150-F        | CAA GAA GAG AGA TTC AGA GAG TTC            |                             |
| RT-1g64150-R        | GAA ACA GAA CTC CTC CGA CAT AAG            |                             |
| 1g64150-GW-F        | CAC CAT GCT AAG TTT GAA TCT CTC GGA G      | Cloning                     |
| 1g64150-GW-R1       | CGT AAC GAT CTC AGC CAC CGT CAC            |                             |
| 1g64150-GW-R2       | TTA CGT AAC GAT CTC AGC CAC CGT CAC        |                             |
| P1:CrCGDL1-ins-for  | AGG TGC AAC GAT GAG CTG TG                 | Chlamydomonas<br>Genotyping |
| P2: CrCGDL1-ins-rev | ATG GGG GAG TTC GGA TGA CA                 |                             |
| P3: RMD326-pBC1     | CAA GCC TCA GCG AGC TCC CCG CTC GAG        |                             |
| PAM71-F             | AGG AGT CGA CAT GCT AAG TTT GAA TCT CTC GG | Yeast<br>Complementation    |
| PAM71-R             | AGG AAC TAG TTT ACG TAA CGA TCT CAG CCA C  |                             |
| psbA-F              | CGG CCA AAA TAA CCG TGG C                  | Probe generation            |
| psbA-R              | TAT ACA ACG GCG GTC CTT ATG                |                             |
| psbB-F              | GTT CTT GAT CCA ATG TGG AG                 |                             |
| psbB-R              | TTC CGG TTA GTC CAT AAG GG                 |                             |
| psbC-F              | TAG CTT TAG CTG GTC GTG AC                 |                             |
| psbC-R              | GAA AGG CAC CTA CAC CTA AC                 |                             |
| rbcL-F              | CGT TGG AGA GAC CGT TTC TT                 |                             |
| rbcL-R              | CAA AGC CCA AAG TTG ACT CC                 |                             |
